# Supplementary material
Source: publisher site journal article supplement (https://www.dovepress.com/article/438479)
Supplement: Supplementary file 1 [file get_supplementary_file.php]

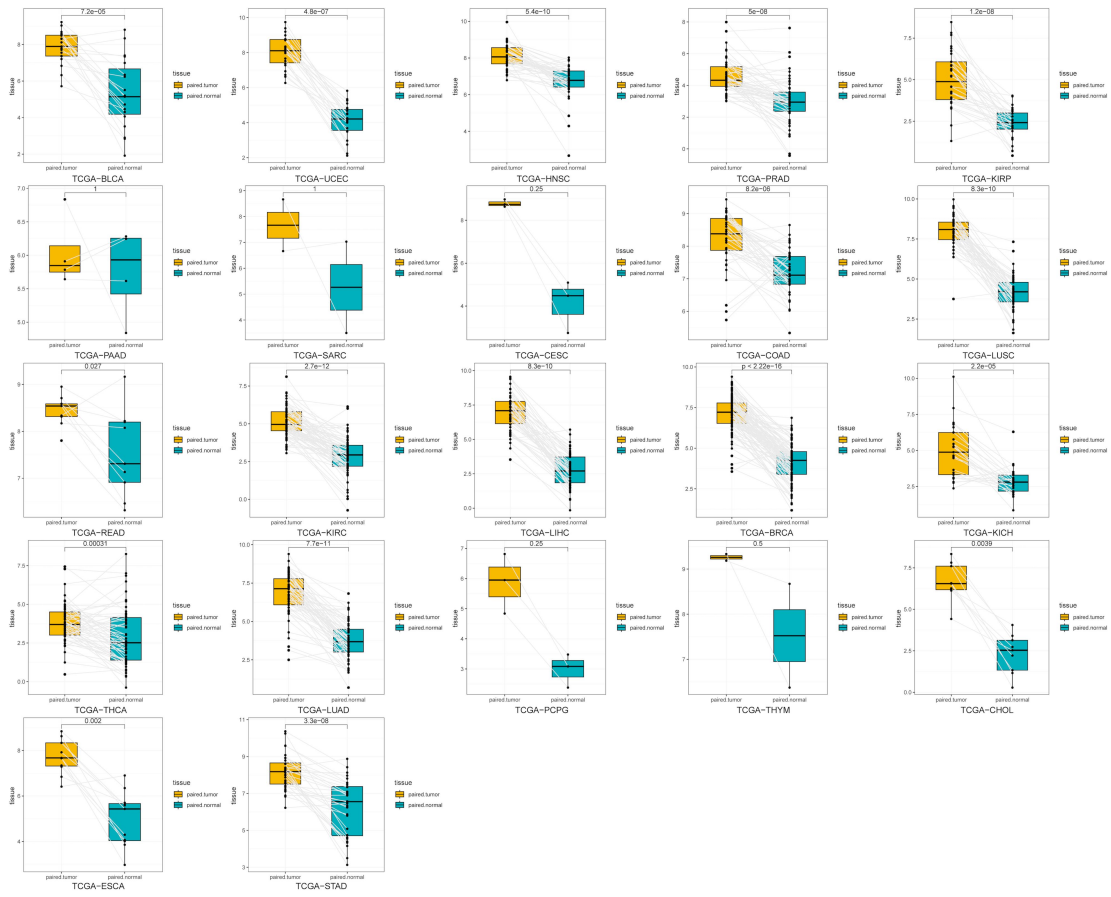

**Supplementary Figure S1** The complete findings on CDKN3 expression in corresponding tumors and normal tissues.



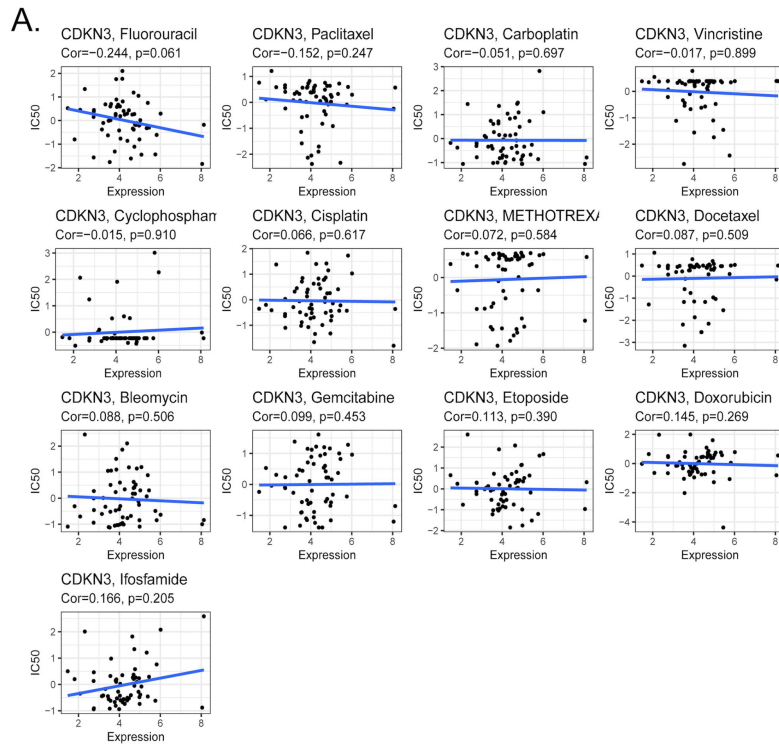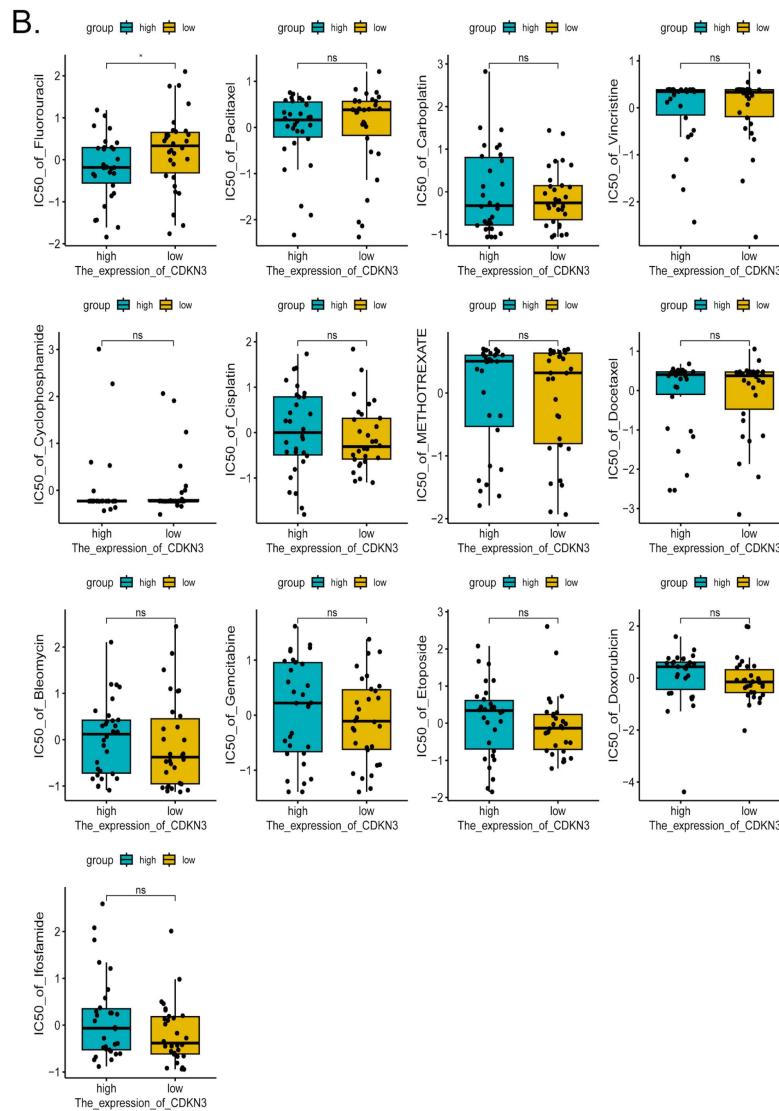

**Supplementary Figure S3** Drug sensitivity to common clinical chemotherapeutic drugs. (A) The correlation between drug sensitivity and CDKN3. Spearman' s correlation coefficients were calculated to investigate the correlation. (B) The different IC50 values of the corresponding drugs in different CDKN3 expression groups. \*p < 0.05, \*\*p < 0.01.

**Supplementary Table S1** The complete results of the correlation between the IC50 values for 408 FDA-approved or clinical trial drugs and CDKN3 expression levels

| Gene  | Drug                       | spearman.cor | spearman.pvalue | pearson.cor  | pearson.pvalue |
|-------|----------------------------|--------------|-----------------|--------------|----------------|
| CDKN3 | norvir                     | -0.336219003 | 0.008626792     | -0.250001415 | 0.054044565    |
| CDKN3 | Vemurafenib                | -0.32019787  | 0.012627191     | -0.248407641 | 0.055646192    |
| CDKN3 | PLX-4720                   | -0.31741136  | 0.013465777     | -0.21899179  | 0.092744845    |
| CDKN3 | Bosutinib                  | -0.303267756 | 0.018500138     | -0.150447164 | 0.251220837    |
| CDKN3 | Denileukin Diffitox Ontak  | -0.296913149 | 0.021238556     | -0.283933793 | 0.027910578    |
| CDKN3 | Tegafur                    | -0.273444898 | 0.03451428      | -0.216762977 | 0.096199943    |
| CDKN3 | RAF-265                    | -0.272387492 | 0.035246747     | -0.198728846 | 0.127960858    |
| CDKN3 | Caffeic acid               | -0.268650303 | 0.037939782     | 0.005413842  | 0.96725319     |
| CDKN3 | Motesanib                  | -0.249360898 | 0.054683675     | -0.137741879 | 0.293942358    |
| CDKN3 | Olaparib                   | -0.246608653 | 0.057500086     | -0.132683541 | 0.312198684    |
| CDKN3 | Fluorouracil               | -0.243747916 | 0.060550842     | -0.247231966 | 0.056852168    |
| CDKN3 | Lexibulin                  | -0.242559814 | 0.061855658     | -0.06907166  | 0.600001098    |
| CDKN3 | Rabusertib                 | -0.237968212 | 0.067112807     | -0.217965892 | 0.09432294     |
| CDKN3 | ergenyl                    | -0.237739143 | 0.067384179     | -0.246087328 | 0.058046569    |
| CDKN3 | Temsirolimus               | -0.232561691 | 0.073755728     | -0.272780586 | 0.034972955    |
| CDKN3 | timazid                    | -0.222205744 | 0.087934308     | -0.269512248 | 0.037304007    |
| CDKN3 | claritin                   | -0.217047586 | 0.095753237     | -0.282702682 | 0.028626039    |
| CDKN3 | BML-277                    | -0.21567941  | 0.09791552      | -0.079999869 | 0.543442237    |
| CDKN3 | Lapatinib                  | -0.212015116 | 0.103893884     | -0.081503091 | 0.535869556    |
| CDKN3 | Itraconazole               | -0.210609913 | 0.106260005     | -0.211793449 | 0.104264402    |
| CDKN3 | Okadaic acid               | -0.210026123 | 0.107255154     | -0.210270231 | 0.106838168    |
| CDKN3 | Hydrastinine HCl           | -0.208323495 | 0.110198591     | -0.16368973  | 0.211404706    |
| CDKN3 | Astex FGF inhibitor        | -0.202106376 | 0.121476413     | -0.154645035 | 0.238083739    |
| CDKN3 | Calusterone                | -0.199599856 | 0.126264078     | -0.084505869 | 0.52089932     |
| CDKN3 | uridin                     | -0.199115878 | 0.127204778     | -0.118263795 | 0.368141075    |
| CDKN3 | Hydroxychloroquine Sulfate | -0.185057074 | 0.156906835     | -0.010719452 | 0.935212803    |
| CDKN3 | Mebendazole                | -0.17986801  | 0.169073089     | -0.168342763 | 0.198531946    |
| CDKN3 | Elesclomol                 | -0.179798454 | 0.169240722     | -0.185129697 | 0.156741276    |
| CDKN3 | LY-2606368                 | -0.178899981 | 0.171416981     | -0.197392913 | 0.130596807    |
| CDKN3 | Everolimus                 | -0.176564269 | 0.17716981      | -0.208661395 | 0.109609554    |
| CDKN3 | salinomycin                | -0.173615839 | 0.184630082     | -0.243315328 | 0.06102333     |
| CDKN3 | cinchonidine               | -0.172373168 | 0.187841242     | -0.082513593 | 0.53080828     |
| CDKN3 | VE-821                     | -0.169664369 | 0.194979681     | -0.110183907 | 0.401984041    |
| CDKN3 | TESTOLACTONE               | -0.168793938 | 0.197314118     | 0.050684331  | 0.700542856    |
| CDKN3 | SR16157                    | -0.168371324 | 0.198454694     | -0.107036486 | 0.415643592    |
| CDKN3 | Sunitinib                  | -0.167752692 | 0.200132751     | -0.045451191 | 0.730217899    |

|       |                                |              |             |              |             |
|-------|--------------------------------|--------------|-------------|--------------|-------------|
| CDKN3 | ETHINYL<br>ESTRADIOL           | -0.162824631 | 0.213861366 | -0.179992186 | 0.168774124 |
| CDKN3 | Arsenic trioxide               | -0.162575196 | 0.214573408 | -0.062079078 | 0.637496519 |
| CDKN3 | DOLASTATIN 10                  | -0.160666899 | 0.220075975 | -0.161590635 | 0.217400197 |
| CDKN3 | Vandetanib                     | -0.158781766 | 0.225607809 | -0.070489966 | 0.592516067 |
| CDKN3 | BMS-599626                     | -0.15845051  | 0.226589765 | -0.065395808 | 0.61959118  |
| CDKN3 | Selumetinib                    | -0.153711461 | 0.240963654 | 0.025703343  | 0.845438994 |
| CDKN3 | Pazopanib                      | -0.15240768  | 0.245025435 | -0.041916961 | 0.75048717  |
| CDKN3 | Paclitaxel                     | -0.151721455 | 0.247181975 | -0.096285535 | 0.464267272 |
| CDKN3 | PI-103                         | -0.15083015  | 0.25000228  | -0.094149625 | 0.474281338 |
| CDKN3 | WORTMANNIN                     | -0.148936466 | 0.256066784 | -0.127884368 | 0.330177798 |
| CDKN3 | Masoprocol                     | -0.148702915 | 0.256821562 | 0.033210788  | 0.801112473 |
| CDKN3 | Ixabepilone                    | -0.148547453 | 0.257324813 | -0.151466931 | 0.247985128 |
| CDKN3 | Dabrafenib                     | -0.147273638 | 0.261473394 | -0.198071985 | 0.12925184  |
| CDKN3 | MK-8033                        | -0.146650551 | 0.263518981 | -0.114092805 | 0.385390207 |
| CDKN3 | Dovitinib                      | -0.145159498 | 0.268457648 | -0.08992313  | 0.49443288  |
| CDKN3 | AZD-8055                       | -0.143991491 | 0.272369293 | -0.161478699 | 0.217723224 |
| CDKN3 | Cediranib                      | -0.143240202 | 0.274905329 | -0.12990114  | 0.322544372 |
| CDKN3 | O-6-<br>Benzylguanine          | -0.143129055 | 0.275281842 | -0.185753825 | 0.155323779 |
| CDKN3 | KX-01                          | -0.141348455 | 0.281360415 | -0.045329044 | 0.730915466 |
| CDKN3 | Vertex ATR<br>inhibitor Cpd 45 | -0.140302614 | 0.284971725 | -0.051533972 | 0.695765242 |
| CDKN3 | Rapamycin                      | -0.139547975 | 0.287596387 | -0.193477113 | 0.138559502 |
| CDKN3 | HYPOTHEMYCIN                   | -0.138079558 | 0.292748978 | -0.033061062 | 0.801990931 |
| CDKN3 | Homoharringtonin<br>e          | -0.137486454 | 0.294847153 | -0.179082859 | 0.170972373 |
| CDKN3 | Zoledronate                    | -0.137385185 | 0.295206383 | -0.177795123 | 0.174121021 |
| CDKN3 | Noscapine                      | -0.135996309 | 0.30016191  | -0.040008418 | 0.761504069 |
| CDKN3 | 4SC-202                        | -0.135693544 | 0.301249307 | -0.161947609 | 0.216372285 |
| CDKN3 | Pimozide                       | -0.135382222 | 0.302370099 | -0.123106905 | 0.348710493 |
| CDKN3 | Gefitinib                      | -0.134791186 | 0.304505311 | -0.076095269 | 0.563351198 |
| CDKN3 | Tipifarnib                     | -0.134029931 | 0.307269796 | -0.14618702  | 0.265047702 |
| CDKN3 | Pipamperone                    | -0.132377459 | 0.313326232 | -0.112632977 | 0.391539106 |
| CDKN3 | Vinorelbine                    | -0.131894428 | 0.315110934 | -0.099322263 | 0.450229327 |
| CDKN3 | RAPAMYCIN                      | -0.131227871 | 0.317584381 | -0.219822765 | 0.091481789 |
| CDKN3 | JNJ-28312141                   | -0.129744902 | 0.323131693 | -0.046894441 | 0.721992265 |
| CDKN3 | CT-32228                       | -0.129366648 | 0.324556405 | -0.111828693 | 0.394951435 |
| CDKN3 | XR-5944                        | -0.129282704 | 0.324873122 | -0.154696591 | 0.237925389 |
| CDKN3 | Deforolimus                    | -0.129213555 | 0.325134165 | -0.104602189 | 0.426388877 |
| CDKN3 | Avagacestat                    | -0.128517699 | 0.327768488 | -0.193982533 | 0.137511743 |
| CDKN3 | Dexamethasone<br>Decadron      | -0.127711059 | 0.330839036 | 0.139807667  | 0.286691383 |

|       |                            |              |             |              |             |
|-------|----------------------------|--------------|-------------|--------------|-------------|
| CDKN3 | Abiraterone                | -0.126898123 | 0.333951825 | -0.152484071 | 0.244786165 |
| CDKN3 | Masitinib                  | -0.124381705 | 0.34370349  | -0.144466601 | 0.270773597 |
| CDKN3 | Cabozantinib               | -0.12145209  | 0.355277005 | -0.087645735 | 0.505473222 |
| CDKN3 | Acetylcysteine             | -0.120956986 | 0.357256312 | -0.148250806 | 0.258286941 |
| CDKN3 | PF-03084014 diastereomer 1 | -0.120786907 | 0.357937803 | -0.154442868 | 0.238705373 |
| CDKN3 | Nandrolone phenpropionate  | -0.120162849 | 0.360445167 | -0.096491536 | 0.463307551 |
| CDKN3 | Pluripotin                 | -0.118799501 | 0.365960109 | -0.038817997 | 0.768399749 |
| CDKN3 | Indibulin                  | -0.116429316 | 0.375669103 | -0.139714752 | 0.287014968 |
| CDKN3 | MK-2206                    | -0.115237659 | 0.380608452 | -0.086973526 | 0.508755939 |
| CDKN3 | Nilotinib                  | -0.114124545 | 0.385257155 | -0.123256807 | 0.348119399 |
| CDKN3 | Intedanib                  | -0.112727323 | 0.391139968 | -0.096723152 | 0.462229782 |
| CDKN3 | Selaciclib                 | -0.112316777 | 0.392878561 | -0.222614954 | 0.087336146 |
| CDKN3 | Tanespimycin               | -0.112216542 | 0.393303729 | -0.067436096 | 0.608684015 |
| CDKN3 | Raloxifene                 | -0.11012157  | 0.402252007 | -0.045473646 | 0.730089688 |
| CDKN3 | Imatinib                   | -0.108464875 | 0.409411713 | -0.186275999 | 0.154145134 |
| CDKN3 | AMG-458                    | -0.105894939 | 0.420663    | -0.084686952 | 0.520003292 |
| CDKN3 | Ezatiostat                 | -0.105662477 | 0.42168937  | -0.145319778 | 0.267923818 |
| CDKN3 | STREPTOZOCIN               | -0.102543508 | 0.435597988 | -0.007284397 | 0.955948493 |
| CDKN3 | Erlotinib                  | -0.100786395 | 0.44354568  | -0.082408552 | 0.531333295 |
| CDKN3 | SGX-523                    | -0.099548829 | 0.449191455 | -0.012229503 | 0.926110102 |
| CDKN3 | auranofin                  | -0.099313641 | 0.450268848 | -0.03479095  | 0.791856645 |
| CDKN3 | Alvespimycin               | -0.099206085 | 0.450762041 | 0.072986438  | 0.579443481 |
| CDKN3 | PF-477736                  | -0.098927361 | 0.452041489 | -0.048325391 | 0.713867517 |
| CDKN3 | Neratinib                  | -0.09717263  | 0.460142135 | -0.04548072  | 0.730049296 |
| CDKN3 | Depsipeptide               | -0.09699564  | 0.46096357  | -0.052813974 | 0.68858987  |
| CDKN3 | Adavosertib                | -0.093528578 | 0.477214608 | -0.066519332 | 0.61357465  |
| CDKN3 | OSI-027                    | -0.09317124  | 0.478906723 | -0.129319434 | 0.324734518 |
| CDKN3 | Buparlisib                 | -0.092614205 | 0.481550824 | -0.059432044 | 0.651936494 |
| CDKN3 | AEG-40730                  | -0.092016024 | 0.484398823 | 0.033222539  | 0.801043539 |
| CDKN3 | Tamoxifen                  | -0.08992386  | 0.494429362 | -0.112371088 | 0.392648301 |
| CDKN3 | Sonolisib                  | -0.089666287 | 0.495671687 | -0.101570644 | 0.439988481 |
| CDKN3 | ARRY-162                   | -0.088373574 | 0.501931119 | 0.057530676  | 0.662388154 |
| CDKN3 | Axitinib                   | -0.087065265 | 0.508307294 | -0.177560913 | 0.174698192 |
| CDKN3 | Cortivazol                 | -0.085761531 | 0.514702074 | -0.015929868 | 0.903846151 |
| CDKN3 | MI-219                     | -0.084881672 | 0.519040648 | -0.098287287 | 0.454987232 |
| CDKN3 | Amiodarone hydrochloride   | -0.084804868 | 0.519420239 | -0.06075353  | 0.644711268 |
| CDKN3 | Estramustine               | -0.082885286 | 0.52895255  | -0.160735792 | 0.219875623 |
| CDKN3 | Fluphenazine               | -0.08042749  | 0.541282774 | -0.102695607 | 0.434913804 |
| CDKN3 | Salinomycin                | -0.08005335  | 0.543171931 | -0.13963416  | 0.287295832 |
| CDKN3 | HPI-1                      | -0.079696553 | 0.544976496 | -0.126046885 | 0.337230921 |

|       |                                          |              |             |              |             |
|-------|------------------------------------------|--------------|-------------|--------------|-------------|
| CDKN3 | AZACITIDINE                              | -0.078831833 | 0.549361963 | -0.008029586 | 0.951447222 |
| CDKN3 | Megestrol acetate                        | -0.077525001 | 0.556021607 | -0.18815059  | 0.149968353 |
| CDKN3 | 1,9-Pyrazoleanthrone                     | -0.076052072 | 0.563573355 | -0.036744923 | 0.780450734 |
| CDKN3 | leflunomide                              | -0.0758998   | 0.564356794 | -0.093858972 | 0.475652921 |
| CDKN3 | PF-04217903                              | -0.074773211 | 0.570168903 | 0.065767618  | 0.617597346 |
| CDKN3 | LY-294002                                | -0.073382514 | 0.577381635 | -0.161149981 | 0.218673778 |
| CDKN3 | Ponatinib                                | -0.073247656 | 0.578083288 | -0.015500577 | 0.906425618 |
| CDKN3 | Apitolisib                               | -0.071833491 | 0.585464417 | -0.046491373 | 0.724286403 |
| CDKN3 | XK-469                                   | -0.067344843 | 0.60917006  | -0.022876866 | 0.862259652 |
| CDKN3 | PF-04691502                              | -0.066715756 | 0.612525369 | -0.048685534 | 0.711827596 |
| CDKN3 | Ixazomib citrate                         | -0.064303678 | 0.625463476 | -0.034692918 | 0.792430055 |
| CDKN3 | Ibrutinib                                | -0.064252565 | 0.625738881 | -0.073772043 | 0.575357161 |
| CDKN3 | (+)-JQ1                                  | -0.062184804 | 0.636922493 | -0.17493927  | 0.181253943 |
| CDKN3 | Quercetin                                | -0.06157437  | 0.64023967  | -0.124795085 | 0.342089515 |
| CDKN3 | E-7820                                   | -0.061029669 | 0.643205573 | 0.013074275  | 0.921021784 |
| CDKN3 | RO-4987655                               | -0.060510914 | 0.646035351 | 0.086464606  | 0.511248462 |
| CDKN3 | Saracatinib                              | -0.060106709 | 0.648243738 | -0.068229483 | 0.604465253 |
| CDKN3 | Lenvatinib                               | -0.059175877 | 0.653340804 | -0.098789609 | 0.452674562 |
| CDKN3 | Curcumin                                 | -0.059159431 | 0.653431007 | -0.059775658 | 0.650054688 |
| CDKN3 | Quisinosat                               | -0.057925522 | 0.66021236  | -0.072612262 | 0.581394405 |
| CDKN3 | Ispinesib                                | -0.057621936 | 0.661885023 | -0.000646136 | 0.996090649 |
| CDKN3 | COLCHICINE                               | -0.057475236 | 0.662693877 | -0.064821316 | 0.622677264 |
| CDKN3 | EMD-534085                               | -0.055715338 | 0.672427065 | -0.034712088 | 0.792317914 |
| CDKN3 | rifa                                     | -0.055098412 | 0.675851798 | -0.035841338 | 0.785719662 |
| CDKN3 | Raltitrexed                              | -0.054673275 | 0.678215668 | -0.110254945 | 0.401678805 |
| CDKN3 | tepotinib                                | -0.054498716 | 0.679187154 | 0.014371319  | 0.913215485 |
| CDKN3 | AMG-900                                  | -0.054086176 | 0.681485156 | -0.012033144 | 0.927293261 |
| CDKN3 | Azacitidine                              | -0.054016505 | 0.681873535 | -0.031033516 | 0.81391031  |
| CDKN3 | Lapachone                                | -0.053935394 | 0.682325788 | -0.014180502 | 0.914363431 |
| CDKN3 | TAK-733                                  | -0.052734181 | 0.689036377 | 0.080763265  | 0.539590054 |
| CDKN3 | Carboplatin                              | -0.051360442 | 0.696740072 | -0.002117358 | 0.987189731 |
| CDKN3 | Tivantinib                               | -0.050377204 | 0.702272718 | 0.066729496  | 0.612452002 |
| CDKN3 | Vinblastine                              | -0.048125148 | 0.715002597 | -0.071044644 | 0.589600178 |
| CDKN3 | PD-0325901                               | -0.046085964 | 0.726596295 | 0.093538621  | 0.477167097 |
| CDKN3 | Entinostat                               | -0.043069314 | 0.743859065 | -0.10228748  | 0.436751038 |
| CDKN3 | BP-1-102                                 | -0.041349989 | 0.753754909 | 0.032147147  | 0.807358202 |
| CDKN3 | PD-98059                                 | -0.041079112 | 0.755317626 | 0.029523167  | 0.822816749 |
| CDKN3 | 6-(4-pyrimidinyl)-1H-indazole derivative | -0.040404602 | 0.759213174 | -0.076642343 | 0.560541246 |
| CDKN3 | MK-0752                                  | -0.039251832 | 0.765884597 | -0.070348166 | 0.593262531 |
| CDKN3 | florid                                   | -0.038597808 | 0.769677201 | -0.10377436  | 0.430078647 |



|       |                          |              |             |              |             |
|-------|--------------------------|--------------|-------------|--------------|-------------|
| CDKN3 | ciclosporin              | -0.038124349 | 0.772426085 | -0.104209113 | 0.428138634 |
| CDKN3 | Haloperidol              | -0.036434379 | 0.782260468 | 0.112609496  | 0.391638482 |
| CDKN3 | geldanamycin analog      | -0.036059336 | 0.784447602 | -0.019931651 | 0.879851773 |
| CDKN3 | Tandutinib               | -0.035567411 | 0.787318871 | -0.07173123  | 0.585999812 |
| CDKN3 | Karenitecin              | -0.033333308 | 0.800393823 | -0.029871608 | 0.820759995 |
| CDKN3 | Clotrimazole             | -0.032205627 | 0.807014493 | -0.067655726 | 0.607514873 |
| CDKN3 | ICG-001                  | -0.031760146 | 0.80963368  | 0.006189822  | 0.962562651 |
| CDKN3 | Benzimate                | -0.029872313 | 0.820755832 | -0.053853505 | 0.682782492 |
| CDKN3 | Bortezomib               | -0.027761182 | 0.833235156 | -0.08715558  | 0.507865813 |
| CDKN3 | pentamidine isethionate  | -0.02717648  | 0.83669883  | -0.118223918 | 0.368303737 |
| CDKN3 | Silmitasertib            | -0.026842281 | 0.838679965 | -0.135004134 | 0.303734882 |
| CDKN3 | Nelfinavir               | -0.024205539 | 0.854344531 | -0.190592904 | 0.144653491 |
| CDKN3 | AZD-5363                 | -0.02403579  | 0.855354977 | -0.071822415 | 0.585522396 |
| CDKN3 | TRIMETREXATE GLUCURONATE | -0.023649729 | 0.857653894 | -0.081254028 | 0.537120659 |
| CDKN3 | VINOELBINE               | -0.022408722 | 0.865051717 | -0.039926332 | 0.761978978 |
| CDKN3 | Eribulin mesilate        | -0.021423808 | 0.870931176 | -0.11876091  | 0.366116957 |
| CDKN3 | AZD-7762                 | -0.02134104  | 0.871425582 | -0.069982902 | 0.595187281 |
| CDKN3 | Pimasertib               | -0.02026661  | 0.877847946 | 0.108622504  | 0.408727327 |
| CDKN3 | Cpd-401                  | -0.019973044 | 0.879604107 | -0.125853713 | 0.337977844 |
| CDKN3 | Amuno                    | -0.019915659 | 0.879947462 | -0.11465021  | 0.383057621 |
| CDKN3 | tfdu                     | -0.018465447 | 0.888631718 | -0.034993648 | 0.790671377 |
| CDKN3 | Vismodegib               | -0.017117055 | 0.896717962 | -0.047090381 | 0.720877916 |
| CDKN3 | Vincristine              | -0.016734421 | 0.899014541 | -0.064262407 | 0.625685849 |
| CDKN3 | Imiquimod                | -0.014946999 | 0.909753306 | -0.167360615 | 0.201201481 |
| CDKN3 | Cyclophosphamide         | -0.014940706 | 0.909791143 | 0.070366341  | 0.593166831 |
| CDKN3 | Luminespib               | -0.01353511  | 0.918247346 | 0.032501449  | 0.805276385 |
| CDKN3 | Alectinib                | -0.011865231 | 0.928305142 | -0.131452536 | 0.316749318 |
| CDKN3 | GSK-2126458              | -0.009502746 | 0.94255326  | 0.007872363  | 0.9523968   |
| CDKN3 | DACARBAZINE              | -0.00844773  | 0.948922103 | -0.034875599 | 0.791361609 |
| CDKN3 | Isotretinoin             | -0.007170352 | 0.956637503 | -0.215340302 | 0.098457281 |
| CDKN3 | Tivozanib                | -0.007058693 | 0.957312124 | -0.064906918 | 0.622217012 |
| CDKN3 | Actinomycin D            | -0.006446772 | 0.961009743 | -0.085508188 | 0.515949422 |
| CDKN3 | melbex                   | -0.006279871 | 0.962018415 | 0.024651068  | 0.851693598 |
| CDKN3 | Colchicine               | -0.002473975 | 0.985032383 | -0.142568542 | 0.277185821 |
| CDKN3 | Rigosertib               | -0.001333926 | 0.991929382 | -0.00894534  | 0.945917747 |
| CDKN3 | ARSENIC TRIOXIDE         | -5.56E-05    | 0.999663737 | -0.02608744  | 0.843158307 |
| CDKN3 | RO-5126766               | 0.001000431  | 0.993947077 | 0.08614785   | 0.512802957 |
| CDKN3 | BMS-536924               | 0.001750608  | 0.989408471 | 0.046826014  | 0.722381559 |

|       |                              |             |             |              |             |
|-------|------------------------------|-------------|-------------|--------------|-------------|
| CDKN3 | 6-<br>MERCAPTOPYRIMIDINE     | 0.00183397  | 0.988904144 | 0.058190508  | 0.658753726 |
| CDKN3 | AT-9283                      | 0.001917252 | 0.988400304 | -0.043335383 | 0.742331293 |
| CDKN3 | TAK-960 analog               | 0.003417901 | 0.979322677 | 0.033286822  | 0.800666469 |
| CDKN3 | CCT-128930                   | 0.003612165 | 0.978147716 | -0.076944373 | 0.558992753 |
| CDKN3 | Dasatinib                    | 0.004612585 | 0.972097681 | 0.03905369   | 0.767033028 |
| CDKN3 | Zalcitabine                  | 0.005312934 | 0.967863234 | 0.120230797  | 0.360171645 |
| CDKN3 | Trametinib                   | 0.005452786 | 0.967017761 | 0.077605013  | 0.555612765 |
| CDKN3 | Dromostanolone<br>Propionate | 0.005530389 | 0.966548627 | -0.10770164  | 0.412734849 |
| CDKN3 | Alvocidib                    | 0.006335357 | 0.961683077 | 0.030165526  | 0.819026008 |
| CDKN3 | XL-147                       | 0.009113896 | 0.944900246 | -0.247867951 | 0.056197189 |
| CDKN3 | PENTAMIDINE<br>ISETHIONATE   | 0.009448513 | 0.942880567 | -0.090622577 | 0.491067494 |
| CDKN3 | aloin                        | 0.009856113 | 0.94042086  | 0.007513577  | 0.954563996 |
| CDKN3 | 6-THIOGUANINE                | 0.011060471 | 0.933156348 | 0.104531965  | 0.426701181 |
| CDKN3 | Amuvatinib                   | 0.012855107 | 0.922341599 | -0.088202042 | 0.502764746 |
| CDKN3 | Mocetinostat                 | 0.013643058 | 0.91759759  | -0.011370151 | 0.931289258 |
| CDKN3 | SB-1317                      | 0.014310525 | 0.913581201 | 0.043164719  | 0.743311134 |
| CDKN3 | AZD-1480                     | 0.014533834 | 0.912237944 | -0.058580989 | 0.656606597 |
| CDKN3 | Sepantronium<br>bromide      | 0.016415426 | 0.900929786 | 0.026636856  | 0.839898216 |
| CDKN3 | Mithramycin                  | 0.016671529 | 0.899392097 | -0.109129735 | 0.406529577 |
| CDKN3 | Artemether                   | 0.016700101 | 0.899220569 | 0.024125971  | 0.854818137 |
| CDKN3 | Teglarinad                   | 0.01732674  | 0.895459779 | 0.015221063  | 0.908105648 |
| CDKN3 | Sonidegib                    | 0.018672113 | 0.887393327 | -0.012527576 | 0.924314371 |
| CDKN3 | JZL-195                      | 0.019582248 | 0.881942812 | -0.097306845 | 0.459519756 |
| CDKN3 | (-)-Nutlin-3                 | 0.020095056 | 0.87887414  | -0.05760613  | 0.661972154 |
| CDKN3 | ITRI-260                     | 0.021618317 | 0.869769489 | 0.001873653  | 0.98866407  |
| CDKN3 | PENTOSTATIN                  | 0.023006035 | 0.861489571 | -0.045817774 | 0.728125693 |
| CDKN3 | Veliparib                    | 0.026700648 | 0.839519864 | -0.044023453 | 0.738384974 |
| CDKN3 | Ergosterol                   | 0.027407021 | 0.835332777 | 0.074304565  | 0.572594818 |
| CDKN3 | Staurosporine                | 0.027955705 | 0.83208353  | 0.088345102  | 0.502069439 |
| CDKN3 | DMAPT                        | 0.031512255 | 0.811092043 | 0.020914548  | 0.873973957 |
| CDKN3 | ENMD-2076<br>Precursor       | 0.031926422 | 0.808655822 | 0.058958038  | 0.654535944 |
| CDKN3 | Acetalax                     | 0.031957316 | 0.808474166 | 0.002854276  | 0.982731878 |
| CDKN3 | PF-562271                    | 0.03362372  | 0.798691036 | 0.011840473  | 0.92845435  |
| CDKN3 | sr 13654                     | 0.033872873 | 0.797230913 | -0.014987023 | 0.909512661 |
| CDKN3 | KW-2449                      | 0.034428621 | 0.793976521 | 0.075999072  | 0.563845982 |
| CDKN3 | nitazoxanide                 | 0.03510186  | 0.790038798 | -0.112442152 | 0.392347134 |
| CDKN3 | Idelalisib                   | 0.036429822 | 0.78228703  | -0.032354631 | 0.806138901 |

|       |                        |             |             |              |             |
|-------|------------------------|-------------|-------------|--------------|-------------|
| CDKN3 | XR-11576               | 0.041237114 | 0.754405978 | 0.012155604  | 0.926555358 |
| CDKN3 | Volasertib             | 0.0416186   | 0.752206228 | 0.090280551  | 0.492711654 |
| CDKN3 | Oxaliplatin            | 0.041820077 | 0.751045254 | 0.057486985  | 0.662629086 |
| CDKN3 | BMS-777607             | 0.042156454 | 0.749108154 | 0.085994603  | 0.513555881 |
| CDKN3 | Daporinad              | 0.042419212 | 0.747596082 | 0.01149381   | 0.930543809 |
| CDKN3 | Mitotane               | 0.043321199 | 0.742412708 | -0.124008945 | 0.345162923 |
| CDKN3 | Artesunate             | 0.043382804 | 0.742059105 | -0.053565775 | 0.684388098 |
| CDKN3 | Triapine               | 0.043873908 | 0.739242102 | 0.002472569  | 0.985040886 |
| CDKN3 | Pictilisib             | 0.044264755 | 0.737002609 | 0.022226     | 0.866141938 |
| CDKN3 | BMS-690514             | 0.045074337 | 0.732370764 | 0.024091974  | 0.855020508 |
| CDKN3 | Kahalide F             | 0.04562949  | 0.729200045 | 0.023289662  | 0.859799079 |
| CDKN3 | Dinaciclib             | 0.045760273 | 0.728453738 | -0.039763482 | 0.762921406 |
| CDKN3 | XAV-939                | 0.048420234 | 0.713330115 | 0.039733267  | 0.763096305 |
| CDKN3 | Abexinostat            | 0.048905191 | 0.710584405 | 0.049507804  | 0.707177643 |
| CDKN3 | Irofulven              | 0.051548541 | 0.695683423 | 0.209434271  | 0.108271367 |
| CDKN3 | Epirubicin             | 0.053125868 | 0.686124535 | -0.103062083 | 0.433267779 |
| CDKN3 | Carmustine             | 0.053272938 | 0.686023625 | 0.051952526  | 0.693415978 |
| CDKN3 | Mifepristone           | 0.053463008 | 0.684961896 | -0.000818619 | 0.995047083 |
| CDKN3 | Nitazoxanide           | 0.054405513 | 0.679706077 | 0.020518731  | 0.876340182 |
| CDKN3 | TAK Plk inhibitor      | 0.055296978 | 0.674748781 | 0.062718295  | 0.634029223 |
| CDKN3 | BI-2536                | 0.055517415 | 0.673525074 | 0.036929927  | 0.779373153 |
| CDKN3 | Des-fluoro-TAK-960     | 0.058613133 | 0.656429968 | 0.061277854  | 0.641853511 |
| CDKN3 | CYC-116                | 0.058768773 | 0.655575012 | 0.068925614  | 0.600774205 |
| CDKN3 | IWR-1                  | 0.061594912 | 0.640127928 | -0.02776445  | 0.833215804 |
| CDKN3 | By-Product of CUDC-305 | 0.062381905 | 0.635852927 | 0.085448134  | 0.516245326 |
| CDKN3 | Fulvestrant            | 0.062633129 | 0.634490735 | 0.008728073  | 0.947229423 |
| CDKN3 | 8-Chloro-adenosine     | 0.062797838 | 0.633598302 | 0.101362263  | 0.440932098 |
| CDKN3 | Amphotericin B         | 0.064880034 | 0.62236154  | 0.011537159  | 0.930282502 |
| CDKN3 | badil                  | 0.064937411 | 0.622053099 | 0.011669168  | 0.929486805 |
| CDKN3 | ABT-737                | 0.065165136 | 0.620829534 | 0.072747479  | 0.580689047 |
| CDKN3 | Cisplatin              | 0.06585437  | 0.617132529 | -0.016510009 | 0.900361852 |
| CDKN3 | Crenolanib             | 0.068943478 | 0.600679615 | -0.01087387  | 0.934281561 |
| CDKN3 | Elliptinium Acetate    | 0.068967434 | 0.600552784 | -0.025148571 | 0.84873534  |
| CDKN3 | ARTENIMOL              | 0.06966211  | 0.59687997  | -0.002257708 | 0.986340675 |
| CDKN3 | Cordycepin             | 0.069792714 | 0.596190566 | 0.057194735  | 0.664241544 |
| CDKN3 | AT-13387               | 0.070492783 | 0.592501246 | 0.129669779  | 0.32341433  |
| CDKN3 | FENRETINIDE            | 0.070691212 | 0.591457391 | 0.111472712  | 0.396467328 |
| CDKN3 | METHOTREXATE           | 0.072101625 | 0.584061641 | 0.029027445  | 0.825744901 |

|                                                |             |             |              |             |
|------------------------------------------------|-------------|-------------|--------------|-------------|
| CDKN3 Afatinib                                 | 0.072266389 | 0.583200415 | 0.017957148  | 0.891678682 |
| CDKN3 ONX-0914                                 | 0.0725858   | 0.581532487 | -0.005992851 | 0.963753164 |
| CDKN3 Y-27632                                  | 0.073124441 | 0.578724697 | 0.064520776  | 0.624294299 |
| CDKN3 Voreloxin                                | 0.07453002  | 0.571427172 | -0.028696969 | 0.827698287 |
| CDKN3 PX-316                                   | 0.074761564 | 0.570229134 | 0.232425428  | 0.07392968  |
| CDKN3 Fludarabine                              | 0.075410884 | 0.566875717 | 0.10873515   | 0.408238657 |
| CDKN3 AR-67                                    | 0.075591537 | 0.565944372 | -0.097772563 | 0.457363705 |
| CDKN3 TYROTHRICIN                              | 0.075751682 | 0.565119355 | 0.031379616  | 0.811872631 |
| CDKN3 OSU-03012                                | 0.077418997 | 0.556563483 | -0.023748828 | 0.857063664 |
| CDKN3 Barasertib                               | 0.077957115 | 0.553815303 | 0.04762316   | 0.717850808 |
| CDKN3 Panobinostat                             | 0.079011428 | 0.548449745 | 0.062569136  | 0.634837606 |
| CDKN3 ZM-336372                                | 0.082222994 | 0.53226137  | 0.148555852  | 0.257297607 |
| CDKN3 PKI-587                                  | 0.082692676 | 0.52991378  | -0.000287464 | 0.998260738 |
| CDKN3 LOR-253                                  | 0.082811133 | 0.529322513 | 0.136593328  | 0.298025161 |
| CDKN3 Quizartinib                              | 0.083084405 | 0.527959748 | -0.084925059 | 0.518826281 |
| CDKN3 1st Precursor Intermediate to TDP 665759 | 0.083250593 | 0.52713184  | 0.166523435  | 0.203497034 |
| CDKN3 artesunate                               | 0.084613889 | 0.520364727 | 0.025802383  | 0.844850794 |
| CDKN3 Amonafide                                | 0.086403115 | 0.511550045 | 0.001096762  | 0.993364256 |
| CDKN3 Docetaxel                                | 0.086852936 | 0.509345989 | 0.022260629  | 0.865935304 |
| CDKN3 Bleomycin                                | 0.087502605 | 0.506171281 | -0.05190403  | 0.693688027 |
| CDKN3 OUABAIN                                  | 0.087556964 | 0.505906111 | 0.02064392   | 0.875591677 |
| CDKN3 CH-5132799                               | 0.088560989 | 0.501021124 | 0.080839043  | 0.539208398 |
| CDKN3 Lificquat                                | 0.089030914 | 0.49874314  | 0.019685965  | 0.881322019 |
| CDKN3 Pevonedistat                             | 0.090113371 | 0.493516349 | 0.014640042  | 0.91159916  |
| CDKN3 Imexon                                   | 0.090205506 | 0.493072786 | 0.069750692  | 0.596412345 |
| CDKN3 tic10                                    | 0.090263595 | 0.492793239 | 0.065873001  | 0.617032724 |
| CDKN3 JNJ-38877605                             | 0.09039501  | 0.492161118 | 0.094975428  | 0.470395979 |
| CDKN3 BN-2629                                  | 0.090754995 | 0.490431719 | -0.021749257 | 0.868987618 |
| CDKN3 Lomustine                                | 0.092174735 | 0.483642317 | 0.06077602   | 0.644588585 |
| CDKN3 Belinostat                               | 0.093195143 | 0.478793436 | 0.07847253   | 0.551189151 |
| CDKN3 AFP464                                   | 0.095428652 | 0.468270882 | 0.04791867   | 0.716173661 |
| CDKN3 GSK-461364                               | 0.095529598 | 0.467798267 | 0.019785578  | 0.880725865 |
| CDKN3 Rebimastat                               | 0.095623724 | 0.467357812 | -0.028140263 | 0.830991218 |
| CDKN3 Epothilone B                             | 0.096915356 | 0.46133644  | -0.028695893 | 0.827704649 |
| CDKN3 Gemcitabine                              | 0.098700938 | 0.45308233  | 0.008917298  | 0.946087032 |
| CDKN3 SNS-314                                  | 0.09876063  | 0.452807806 | 0.054115126  | 0.681323799 |
| CDKN3 Bendamustine                             | 0.100738174 | 0.443764926 | 0.049797768  | 0.705540418 |
| CDKN3 Pracinostat                              | 0.102117373 | 0.437518082 | 0.104989345  | 0.42466945  |
| CDKN3 Valrubicin                               | 0.102839836 | 0.434265584 | -0.024188673 | 0.854444917 |
| CDKN3 Celecoxib                                | 0.104024237 | 0.428963007 | -0.106984627 | 0.415870866 |
| CDKN3 Copanlisib                               | 0.108307863 | 0.409097569 | 0.070891669  | 0.590403712 |

|       |                             |             |             |              |             |
|-------|-----------------------------|-------------|-------------|--------------|-------------|
| CDKN3 | Vorinostat                  | 0.10930966  | 0.405751643 | 0.084480161  | 0.521026591 |
| CDKN3 | 6-Thioguanine               | 0.111520239 | 0.396264741 | 0.182394579  | 0.163065953 |
| CDKN3 | Sapitinib                   | 0.112005118 | 0.394201424 | 0.057933911  | 0.660166163 |
| CDKN3 | Etoposide                   | 0.112978966 | 0.390076558 | -0.020263432 | 0.877866959 |
| CDKN3 | 6-Mercaptopurine            | 0.114099928 | 0.385360343 | 0.127826729  | 0.33039762  |
| CDKN3 | Palbociclib                 | 0.114351615 | 0.384306111 | 0.137713945  | 0.294041222 |
| CDKN3 | Simvastatin                 | 0.115394768 | 0.379955031 | 0.136148103  | 0.299617695 |
| CDKN3 | BX-912                      | 0.115397974 | 0.379941702 | 0.060762754  | 0.644660952 |
| CDKN3 | Floxuridine                 | 0.116519154 | 0.375298297 | -0.075201825 | 0.567954397 |
| CDKN3 | Camptothecin                | 0.116710434 | 0.374509532 | 0.03525302   | 0.789155392 |
| CDKN3 | brigatinib                  | 0.117073307 | 0.373015921 | -0.059099397 | 0.653760304 |
| CDKN3 | Obatoclox                   | 0.117313624 | 0.372028741 | 0.219558512  | 0.091881976 |
| CDKN3 | Parthenolide                | 0.11762581  | 0.370748693 | 0.09962323   | 0.448850918 |
|       | 7-                          |             |             |              |             |
| CDKN3 | Hydroxystaurosporine        | 0.118653959 | 0.366551862 | 0.015562815  | 0.906051591 |
| CDKN3 | Ribavirin                   | 0.12106529  | 0.356822764 | 0.266550183  | 0.039526485 |
| CDKN3 | malacid                     | 0.121205385 | 0.356262428 | 0.122094307  | 0.352719641 |
| CDKN3 | Crizotinib                  | 0.122429699 | 0.3513886   | 0.00406394   | 0.975415432 |
| CDKN3 | CUDC-305                    | 0.123207736 | 0.348312826 | 0.105541337  | 0.422224799 |
| CDKN3 | Linsitinib                  | 0.125475922 | 0.33944161  | 0.146561309  | 0.26381284  |
| CDKN3 | Mitomycin                   | 0.125868297 | 0.337002939 | 0.002567453  | 0.984466906 |
| CDKN3 | Allopurinol                 | 0.1276105   | 0.331223089 | 0.171102328  | 0.191166507 |
| CDKN3 | aclarubicin                 | 0.127792598 | 0.330527832 | 0.119230795  | 0.364209943 |
| CDKN3 | Varbulin                    | 0.128344881 | 0.328424813 | 0.02697056   | 0.837919408 |
| CDKN3 | 5-Fluoro deoxyuridine 10mer | 0.128592012 | 0.327486518 | -0.068870662 | 0.601065215 |
| CDKN3 | benzaldehyde (BEN)          | 0.128714935 | 0.327020439 | 0.056037647  | 0.670640457 |
| CDKN3 | Lovastatin                  | 0.130234238 | 0.321294482 | 0.149378953  | 0.254640893 |
| CDKN3 | ENMD-2076                   | 0.131132509 | 0.317939262 | 0.191126588  | 0.143511058 |
| CDKN3 | Midostaurin                 | 0.131995777 | 0.314735931 | 0.128228761  | 0.32886628  |
| CDKN3 | Carfilzomib                 | 0.13208282  | 0.31441409  | 0.02603673   | 0.843459339 |
| CDKN3 | IDOXURIDINE                 | 0.132492415 | 0.31290245  | 0.037468333  | 0.776239484 |
| CDKN3 | pralatrexate                | 0.132940276 | 0.311254933 | 0.092438292  | 0.482387441 |
| CDKN3 | Teniposide                  | 0.134791186 | 0.304505311 | -0.030549331 | 0.816763029 |
| CDKN3 | 3-Bromopyruvate (acid)      | 0.134983355 | 0.303810005 | 0.150208301  | 0.251982873 |
| CDKN3 | Cytarabine                  | 0.13520798  | 0.302998564 | 0.093124982  | 0.479126003 |
| CDKN3 | IDEBENONE                   | 0.135989775 | 0.300185352 | 0.054351712  | 0.680005688 |
| CDKN3 | Asparaginase                | 0.136660461 | 0.297785509 | 0.11402637   | 0.385668782 |
| CDKN3 | Pyrazoloacridine            | 0.13976687  | 0.286833432 | 0.149523651  | 0.25417578  |
| CDKN3 | TAK-901                     | 0.139991108 | 0.286053234 | 0.047273031  | 0.719839661 |

|       |                                          |             |             |              |             |
|-------|------------------------------------------|-------------|-------------|--------------|-------------|
| CDKN3 | SB-590885                                | 0.141445861 | 0.281025618 | 0.003882549  | 0.976512431 |
| CDKN3 | Bisacodyl, active ingredient of Viraplex | 0.141504865 | 0.280822941 | 0.015592431  | 0.905873616 |
| CDKN3 | Acrichine                                | 0.142505803 | 0.277399479 | 0.091138533  | 0.488592683 |
| CDKN3 | MONENSIN SODIUM                          | 0.142585209 | 0.27712908  | 0.077278261  | 0.557283291 |
| CDKN3 | Doxorubicin                              | 0.144958946 | 0.269126607 | -0.046616561 | 0.723573613 |
| CDKN3 | Perifosine                               | 0.145137761 | 0.268530101 | 0.089439879  | 0.496765034 |
| CDKN3 | M-AMSA                                   | 0.145375735 | 0.267737616 | 0.038393297  | 0.770864236 |
| CDKN3 | Pipobroman                               | 0.149260785 | 0.255021157 | 0.075035943  | 0.568810981 |
| CDKN3 | Cyclobenzaprine Hydrochloride            | 0.152650375 | 0.244265826 | 0.102026246  | 0.437929298 |
| CDKN3 | Buthionine sulphoximine                  | 0.15305979  | 0.242988051 | 0.064467277  | 0.624582332 |
| CDKN3 | Idarubicin                               | 0.153863255 | 0.240493778 | 0.071991394  | 0.584638147 |
| CDKN3 | RH1                                      | 0.155395925 | 0.235784613 | 0.050733878  | 0.700263934 |
| CDKN3 | Methylprednisolone                       | 0.155735091 | 0.234751161 | 0.196987575  | 0.131404641 |
| CDKN3 | Batracylin                               | 0.157114474 | 0.230580341 | 0.150864121  | 0.249894387 |
| CDKN3 | Econazole nitrate                        | 0.158200412 | 0.227333101 | 0.039497464  | 0.764461616 |
| CDKN3 | AS-703569                                | 0.162243285 | 0.215523465 | 0.185925748  | 0.154934983 |
| CDKN3 | Cladribine                               | 0.164367194 | 0.209494803 | 0.099490328  | 0.449459314 |
| CDKN3 | Nitrogen mustard                         | 0.165305102 | 0.206870792 | 0.077026407  | 0.558572521 |
| CDKN3 | Ifosfamide                               | 0.165918722 | 0.205166672 | 0.223102919  | 0.08662705  |
| CDKN3 | Pemetrexed                               | 0.167622723 | 0.200486576 | 0.09055513   | 0.491391495 |
| CDKN3 | Fenretinide                              | 0.167852381 | 0.199861662 | 0.085433733  | 0.516316296 |
| CDKN3 | Foretinib                                | 0.172870383 | 0.186551617 | 0.088944007  | 0.49916402  |
| CDKN3 | 7-Ethyl-10-hydroxycamptothecin           | 0.173547729 | 0.184805053 | 0.076283368  | 0.562384315 |
| CDKN3 | Thiotepa                                 | 0.178617576 | 0.17210521  | 0.101299198  | 0.4412179   |
| CDKN3 | KHK-Indazole                             | 0.184425148 | 0.158352875 | 0.143036127  | 0.275596904 |
| CDKN3 | Fostamatinib                             | 0.18744356  | 0.151533701 | 0.118070962  | 0.368928061 |
| CDKN3 | Melphalan                                | 0.187832562 | 0.150670966 | 0.10178956   | 0.438998369 |
| CDKN3 | Navitoclax                               | 0.189745532 | 0.146481343 | 0.071902723  | 0.585102079 |
| CDKN3 | Topotecan                                | 0.190715706 | 0.144390015 | 0.060430999  | 0.64647173  |
| CDKN3 | AMINOFLAVONE                             | 0.192621417 | 0.140347032 | 0.125466942  | 0.339476451 |
| CDKN3 | DIGOXIN                                  | 0.196926754 | 0.131526183 | 0.078664728  | 0.550211391 |
| CDKN3 | Ancitabine hydrochloride                 | 0.197526749 | 0.130330899 | 0.169970303  | 0.194163892 |
| CDKN3 | LMP-400                                  | 0.201606181 | 0.122420611 | 0.089915931  | 0.494467581 |
| CDKN3 | Irinotecan                               | 0.204315268 | 0.117372975 | 0.085524254  | 0.515870277 |
| CDKN3 | Mitoxantrone                             | 0.206729834 | 0.113009591 | 0.08967684   | 0.495620757 |

|       |                             |             |             |             |             |
|-------|-----------------------------|-------------|-------------|-------------|-------------|
| CDKN3 | Alisertib                   | 0.206878348 | 0.112745331 | 0.132251616 | 0.313790572 |
| CDKN3 | Daunorubicin                | 0.208205399 | 0.110405033 | 0.082560737 | 0.530572729 |
| CDKN3 | TRICIRIBINE<br>PHOSPHATE    | 0.209365015 | 0.108390764 | 0.168332541 | 0.198559598 |
| CDKN3 | Fluvastatin                 | 0.209711706 | 0.10779409  | 0.203955675 | 0.118033668 |
| CDKN3 | DECITABINE                  | 0.211557443 | 0.104660008 | 0.00685153  | 0.958563838 |
| CDKN3 | Econazole Nitrate           | 0.213382611 | 0.101630602 | 0.155901702 | 0.23424464  |
| CDKN3 | LMP776                      | 0.219796536 | 0.091521448 | 0.143276617 | 0.274782045 |
| CDKN3 | Triethylenemelamine         | 0.220835882 | 0.089960138 | 0.104932248 | 0.424922783 |
| CDKN3 | PYRAZOLOACRIDINE            | 0.223577632 | 0.085941563 | 0.245809975 | 0.058339013 |
| CDKN3 | MITOXANTRONE                | 0.224259088 | 0.084965006 | 0.057450384 | 0.662830944 |
| CDKN3 | ST-3595                     | 0.224682885 | 0.084362109 | 0.227083739 | 0.081010021 |
| CDKN3 | ANCITABINE<br>HYDROCHLORIDE | 0.224691056 | 0.084350518 | 0.161201523 | 0.218524542 |
| CDKN3 | Chelerythrine               | 0.225357225 | 0.083409742 | 0.383122946 | 0.002515842 |
| CDKN3 | Chlorambucil                | 0.225899683 | 0.082649802 | 0.131010136 | 0.318395028 |
| CDKN3 | AMONAFIDE                   | 0.226797822 | 0.081403608 | 0.277366342 | 0.031907538 |
| CDKN3 | Clofarabine                 | 0.231400825 | 0.075248155 | 0.141102611 | 0.282206588 |
| CDKN3 | SCH-1473759                 | 0.237061121 | 0.068192566 | 0.279266094 | 0.030705052 |
| CDKN3 | Dexrazoxane                 | 0.238911742 | 0.066004258 | 0.249451295 | 0.054593107 |
| CDKN3 | Hydroxyurea                 | 0.241545091 | 0.06298792  | 0.194057605 | 0.137356625 |
| CDKN3 | Uracil mustard              | 0.243998    | 0.060279042 | 0.155273767 | 0.236157599 |
| CDKN3 | DAUNORUBICIN                | 0.247964432 | 0.056098364 | 0.047263847 | 0.719891857 |
| CDKN3 | Ofloxacin                   | 0.252350555 | 0.05175235  | 0.064784357 | 0.622876025 |
| CDKN3 | CAMPTOTHECIN                | 0.252650301 | 0.051465653 | 0.077455545 | 0.556376624 |
| CDKN3 | TAE-684                     | 0.28663925  | 0.026390915 | 0.106582444 | 0.417635883 |
| CDKN3 | Nelarabine                  | 0.299511224 | 0.020080024 | 0.206510725 | 0.113400334 |
| CDKN3 | BMS-754807                  | 0.311362438 | 0.015452457 | 0.266999448 | 0.039182519 |
| CDKN3 | Procarbazine                | 0.31798925  | 0.013288031 | 0.131011652 | 0.318389381 |
